# Supplementary material for: Comparative study of preparation, characterization and anticandidal activities of a chitosan silver nanocomposite (CAgNC) compared with low molecular weight chitosan (LMW-chitosan)
Source: Royal Society of Chemistry journal article supplement (doi:10.1039/c6ra03917k), 2016-01-01
Supplement: c6ra03917k1.pdf [file c6ra03917k1.pdf]

1 **Electronic Supplementary Information**

2  
3 **Comparative study of preparation, characterization and anticandidal**  
4 **activities of chitosan silver nano composite (CAgNC) compared with low**  
5 **molecular weight chitosan (LMW-chitosan)**  
6

7 Dananjaya S.H.S<sup>a</sup>., Kulatunga D.C.M<sup>a</sup>., G.I. Godahewa<sup>b</sup>, Jehee Lee<sup>b</sup>, Mahanama De Zoysa<sup>a,b\*</sup>

8  
9 <sup>a</sup>College of Veterinary Medicine and Research Institute of Veterinary Medicine,  
10 Chungnam National University, Yuseong-gu, Daejeon, 305-764, Republic of Korea.

11  
12 <sup>b</sup>Fish Vaccine Research Center, Jeju National University, Jeju Self-Governing Province  
13 690-756, Republic of Korea  
14

15  
16  
17  
18  
19  
20  
21 \* Corresponding author:

22 Mahanama De Zoysa

23 College of Veterinary Medicine and Research Institute of Veterinary Medicine,  
24 Chungnam National University, Yuseong-gu, Daejeon, 305-764, Republic of Korea.

25 Tel:+82428216795; Fax:+82428218903

26 E-mail:mahanama@cnu.ac.kr; (De Zoysa, M)

27

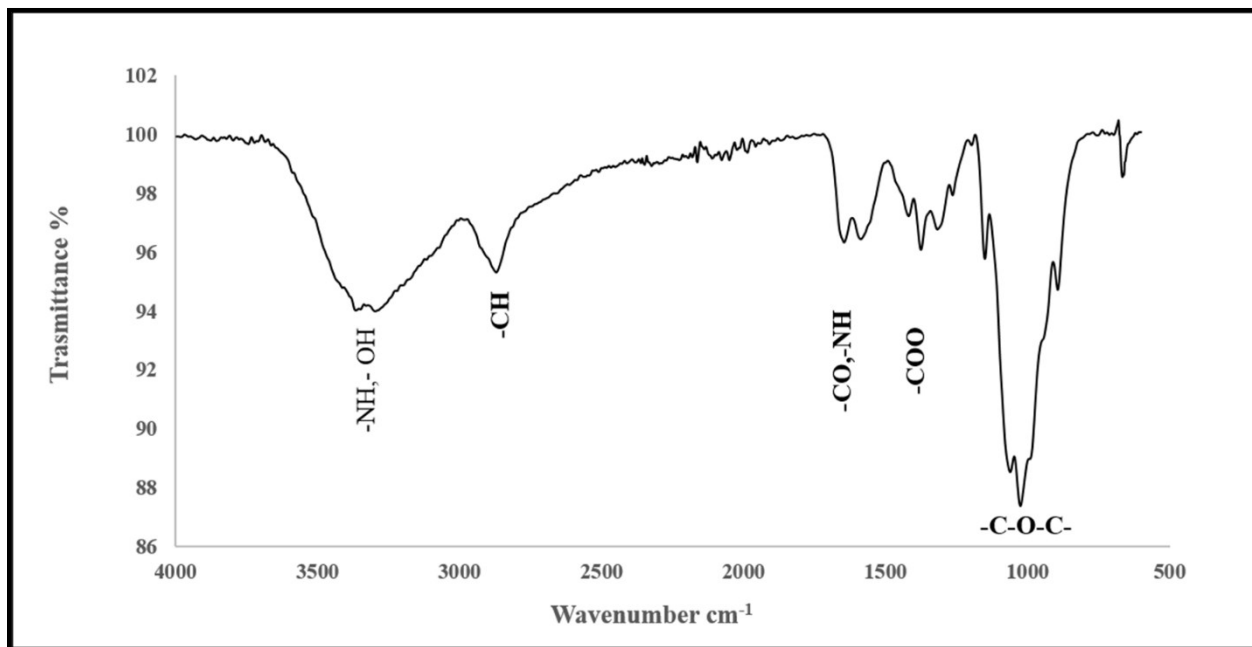

28

29

204 x 104 mm (200 x 200 DPI)

30 **Fig. S1** FT-IR spectra of synthesized CAgNC.

31

32

33

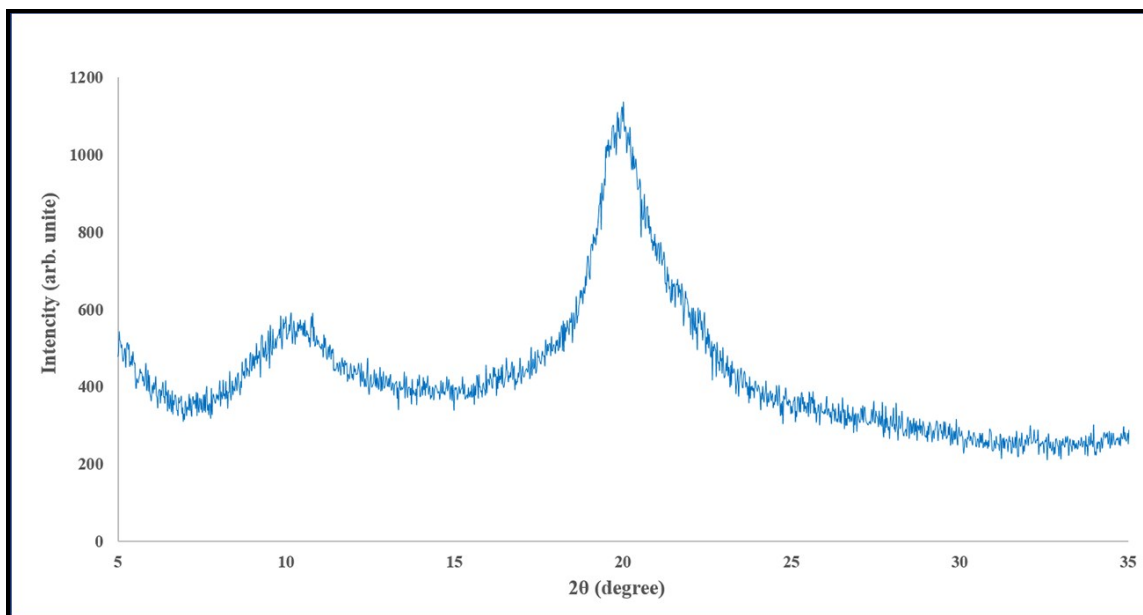

34

35

36

220 x 116 mm (150 x 150 DPI)

37 **Fig. S2.** The XRD graphs of the LMW-chitosan.

38

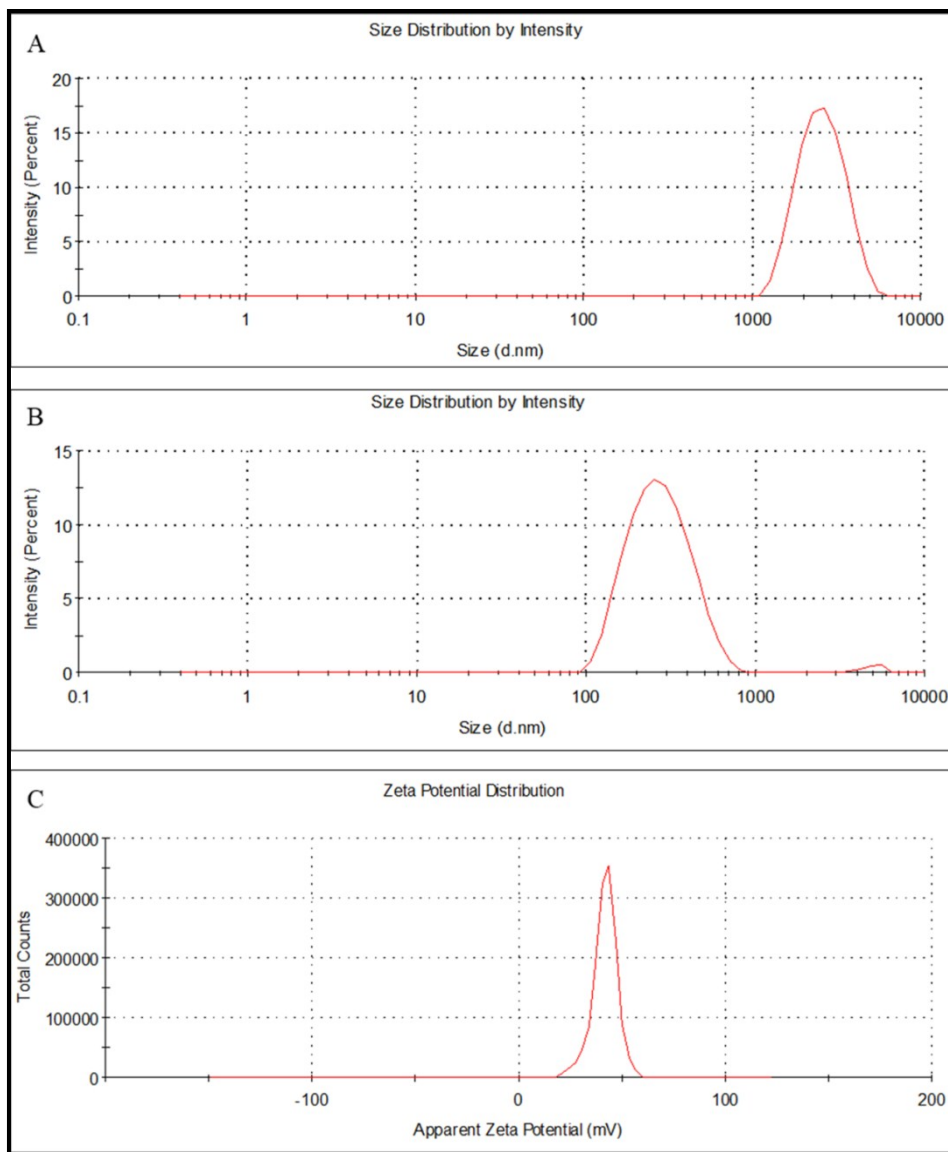

39

40

155 x 187 mm (300 x 300 DPI)

41 **Fig. S3.** Particle size and zeta potential distribution. (A) Size distribution of LMW-chitosan (B)

42 size distribution of CAgNC (C) Zeta potential distribution of CAgNC.

43

44

45

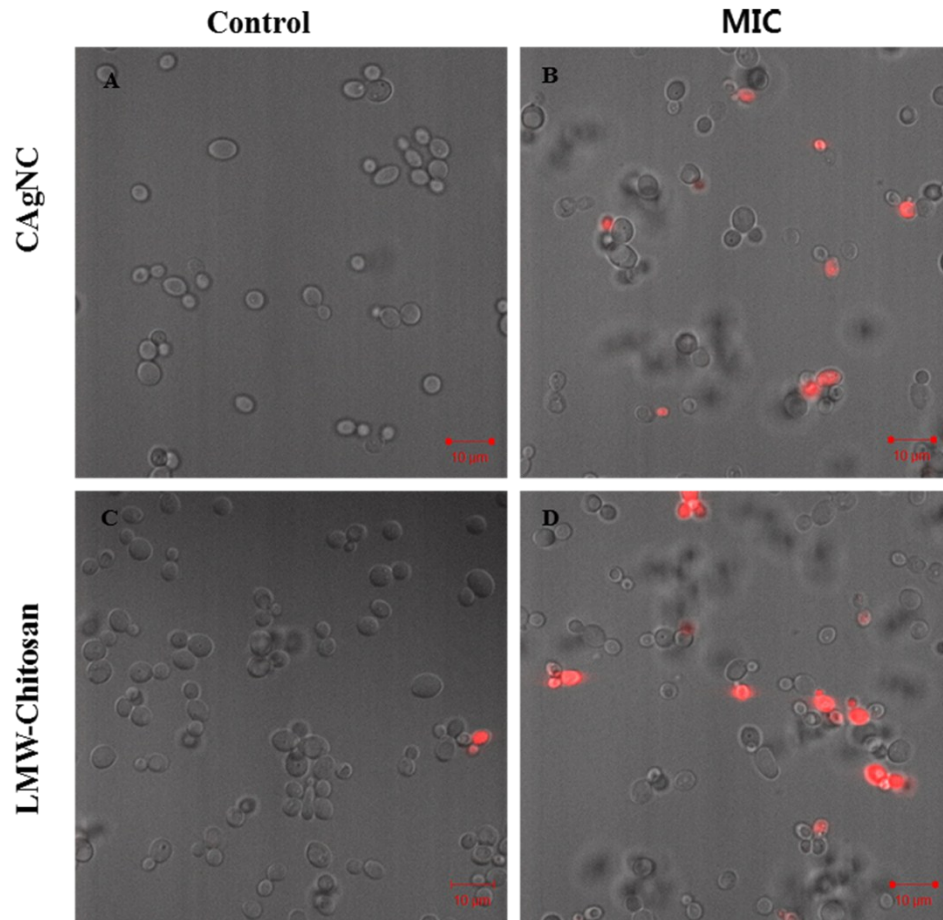

130 x 123 mm (250 x 250 DPI)

46

47

48 **Figure S4.** Merged image of *C. albicans* taken by confocal laser scanning microscopy (A) Untreated

49 (B) LMW-chitosan treated at MIC level (C) Untreated (D) LMW-chitosan treated at MIC level (Red

50 denotes dead cells).

51

52

53
